# Supplementary material for: Enhanced scale inhibition against Ca3(PO4)2and Fe2O3in water using multi-functional fluorescently-tagged antibacterial scale inhibitors
Source: Royal Society of Chemistry journal article supplement (doi:10.1039/c9ew01036j), 2020-01-01
Supplement: c9ew01036j1.pdf [file c9ew01036j1.pdf]

**Supporting Information for**  
**Enhanced Scale Inhibition against  $\text{Ca}_3(\text{PO}_4)_2$  and  $\text{Fe}_2\text{O}_3$  in**  
**Water Using Multi-Functional Fluorescent-Tagged Antibacterial**  
**Scale Inhibitors**

Shaopeng ZHANG <sup>a,#</sup>, Xin JIANG <sup>a,#</sup>, Shikun Cheng <sup>b</sup>, Chang'e FU <sup>c</sup>, Ziqi TIAN <sup>d</sup>,  
Zhen YANG <sup>a,\*</sup>, Weiben YANG <sup>a,\*</sup>

<sup>a</sup> School of Chemistry and Materials Science, Jiangsu Provincial Key Laboratory of Materials Cycling and Pollution Control, Nanjing Normal University, Nanjing 210023, P. R. China

<sup>b</sup> School of Energy and Environmental Engineering, Beijing Key Laboratory of Resource-Oriented Treatment of Industrial Pollutants, University of Science and Technology Beijing, Beijing 100083, P. R. China

<sup>c</sup> College of the Environment and Ecology, Jiangsu Open University, Nanjing 210036, P. R. China

<sup>d</sup> Ningbo Institute of Materials Technology & Engineering, Chinese Academy of Sciences, Ningbo 315000, P. R. China

<sup>#</sup> Both authors contributed equally.

<sup>\*</sup> Corresponding authors.

E-mail: yangzhen@njnu.edu.cn (Z. Y.), yangwb007@njnu.edu.cn (W. Y.)

## Summary

**Total pages:** 15 (S1-S15)

**Text S1.** Synthetic method of FM-AA-APEO. (S3)

**Text S2.** Calculation methods of  $X$  and  $Y$  in AA-APEO- $X$  and FM-AA-APEO- $Y$ . (S4)

**Text S3.** Methodologies and results of structural characterization of scale inhibitors. (S5)

**Table S1.** Coded levels for two variables of fluorescent intensity response in binary-solute solutions containing FM-AA-APEO and calcium ions in RSM analysis. (S6)

**Table S2.** Coded levels for two variables of fluorescent intensity response in binary-solute solutions containing FM-AA-APEO and ferric ions in RSM analysis. (S7)

**Table S3.** RSM experimental design and results for fluorescent intensity response in binary-solute solutions containing FM-AA-APEO and calcium ions. (S8)

**Table S4.** RSM experimental design and results for fluorescent intensity response in binary-solute solutions containing FM-AA-APEO and ferric ions. (S9)

**Fig. S1.** Synthetic route of scale inhibitor FM-AA-APEO. (S10)

**Fig. S2.** (a) FTIR, (b)  $^1\text{H}$  NMR, (c) UV-vis spectra and (d) TG curves of different samples. (S11)

**Fig. S3.** Chemical structure of two commercial scale inhibitors (PAPEMP and JH-907). (S12)

**Fig. S4.** Comparison between experimental and predicted values from RSM regression equations. (S13)

**Fig. S5.** UV spectra of AA-APEO-1.56% solution with the coexistence of different concentrations of (a)  $\text{Ca}^{2+}$  and (b)  $\text{Fe}^{3+}$ . (S14)

**Fig. S6.** O1s XPS spectra of (a and b)  $\text{Ca}_3(\text{PO}_4)_2$  and (c and d)  $\text{Fe}_2\text{O}_3$  precipitates (a and c) without and (b and d) with the coexistence of FM-AA-APEO. (S15)

**Text S1.** Synthetic method of FM-AA-APEO.

After certain amounts of AA, APEO and FM (degree of polymerization: 10) with designed ratios was dissolved in 90 mL of water, the solution was kept at 70 °C under magnetic stirring and nitrogen condition for 30 min. Subsequently, initiator solution (0.3 g of ammonium persulfate dissolved in 15 mL of water) was added dropwise over a period of 1 h. The reaction mixture was heated to 80 °C and maintained at this temperature for a further 2 h. Solid scale inhibitor product was finally obtained after precipitation using excessive acetone, washing with ethanol, and vacuum drying at 45 °C for 24 h.

**Text S2.** Calculation methods of  $X$  and  $Y$  in AA-APEO- $X$  and FM-AA-APEO- $Y$ .

(1) For 1 mol of APEO repeated unit in AA-APEO- $X$ , there were  $X$  mol of AA repeated units. Hence, mass of C and H atoms could be expressed as follows:

$$M_{(\text{C atoms})} = (3X+23) \text{ mol} \times 12 \text{ g/mol} = (36X+276) \text{ g};$$

$$M_{(\text{H atoms})} = (4X+46) \text{ mol} \times 1 \text{ g/mol} = (4X+46) \text{ g}.$$

Therefore,  $M_{(\text{C atoms})}/M_{(\text{H atoms})}$  equaled  $(36X+276)/(4X+46)$ , where the mass ratio of C and H was obtained from elemental analysis.

(2) Performance results of AA-APEO in Section 3.1 showed that the optimized molar ratio of AA:APEO was 8:1 in AA-APEO. Thus, the ratio of AA:APEO of 8:1 was further used in the ternary copolymers (FM-AA-APEO). For  $Y$  mol of FM repeated unit in FM-AA-APEO- $Y$ , there were  $[8 \times (1-Y)/9]$  mol of AA and  $(1-Y)/9$  mol of APEO units, respectively. Hence, mass of C and N atoms can be expressed as follows:

$$M_{(\text{C atoms})} = [3 \times 8 \times (1-Y)/9 + 23 \times (1-Y)/9 + 22Y] \times 12 \text{ g/mol} = (188+604Y)/3 \text{ g};$$

$$M_{(\text{N atoms})} = 3 \times Y \text{ mol} \times 14 \text{ g/mol} = 42Y \text{ g};$$

Therefore,  $M_{(\text{N atoms})}/M_{(\text{C atoms})}$  equaled  $63Y/(94+302Y)$ , where the mass ratio of N and C is obtained from elemental analysis.

**Text S3.** Methodologies and results of structural characterization of scale inhibitors.

FTIR spectra were recorded on a Bruker Tensor 27 IR spectrometer system using samples pelletized with KBr.  $^1\text{H}$  NMR spectra were recorded on a Bruker model AVANCE400 NMR spectrometer using  $\text{D}_2\text{O}$  as the solvent. UV-vis spectra were recorded on a Hitachi UH-5300 UV-vis spectrophotometer. Elemental analysis was conducted on a Vario EL III elemental analyzer. Thermogravimetric (TG) analysis was performed on a Diamond DMA spectrometer.

The FTIR spectra were shown in SI Figure S2a. Peaks at  $1730$  and  $1107\text{ cm}^{-1}$  indicated C=O and C-O in FP-AA-APEO, respectively. Besides, characteristic peaks of FM monomers at  $787$  and  $1398\text{ cm}^{-1}$  (C-N in N-methyl piperazine) remained slight peaks in the final FM-AA-APEO.  $^1\text{H}$  NMR spectra in SI Figure S2b confirmed that the main structure of the designed inhibitor FM-AA-APEO was found. UV spectra in SI Figure S2c demonstrated that, the final FM-AA-APEO owned the main adsorption peak at  $388\text{ nm}$  due to the existence of FM groups, while AA-APEO08 did not. TG curves in SI Figure S4d showed that, FM-AA-APEO-1.56% had better thermal stability than AA-APEO-8 without the fluorescent groups.

**Table S1.** Coded levels for two variables of fluorescent intensity response in binary-solute solutions containing FM-AA-APEO and calcium ions in RSM analysis.

| Factors                                  | Range and Levels |     |     |     |      |
|------------------------------------------|------------------|-----|-----|-----|------|
|                                          | -2               | -1  | 0   | 1   | 2    |
| X <sub>1</sub> : Ca <sup>2+</sup> (mg/L) | 200              | 400 | 600 | 800 | 1000 |
| X <sub>2</sub> : Dosage (mg/L)           | 2                | 4   | 6   | 8   | 10   |

**Table S2.** Coded levels for two variables of fluorescent intensity response in binary-solute solutions containing FM-AA-APEO and ferric ions in RSM analysis.

| Factors                                  | Range and Levels |    |    |    |    |
|------------------------------------------|------------------|----|----|----|----|
|                                          | -2               | -1 | 0  | 1  | 2  |
| X <sub>1</sub> : Fe <sup>3+</sup> (mg/L) | 5                | 10 | 15 | 20 | 25 |
| X <sub>2</sub> : Dosage (mg/L)           | 2                | 10 | 18 | 26 | 34 |

**Table S3.** RSM experimental design and results for fluorescent intensity response in binary-solute solutions containing FM-AA-APEO and calcium ions.

|    | <b>Ca<sup>2+</sup> concentration <sup>a</sup></b> | <b>Dosage <sup>a</sup></b> | <b>Experimental value</b> | <b>Predicted value</b> |
|----|---------------------------------------------------|----------------------------|---------------------------|------------------------|
| 1  | 2 (1000)                                          | -2 (2)                     | 138.6                     | 158.44                 |
| 2  | -2 (200)                                          | 2 (10)                     | 1310                      | 1294.16                |
| 3  | -1 (400)                                          | 0 (6)                      | 731.9                     | 747.73                 |
| 4  | 1 (800)                                           | 1 (8)                      | 962.6                     | 958.09                 |
| 5  | 0 (600)                                           | 0 (6)                      | 711.8                     | 726.14                 |
| 6  | 0 (600)                                           | 1 (8)                      | 978.7                     | 988.56                 |
| 7  | 2 (1000)                                          | 0 (6)                      | 668.0                     | 656.2                  |
| 8  | 0 (600)                                           | -2 (2)                     | 232.9                     | 228.54                 |
| 9  | 1 (800)                                           | -1 (4)                     | 465.1                     | 442.25                 |
| 10 | 1 (800)                                           | 0 (6)                      | 688.3                     | 695.63                 |
| 11 | 0 (600)                                           | 2 (10)                     | 1247                      | 1260.06                |
| 12 | 0 (600)                                           | -1 (4)                     | 484.2                     | 472.8                  |
| 13 | -2 (200)                                          | -2 (2)                     | 260.7                     | 262.96                 |
| 14 | -1 (400)                                          | 1 (8)                      | 1020                      | 1010.11                |
| 15 | 2 (1000)                                          | 2 (10)                     | 1192                      | 1190.28                |
| 16 | -1 (400)                                          | -1 (4)                     | 509.1                     | 494.43                 |
| 17 | -2 (200)                                          | 0 (6)                      | 746.1                     | 760.4                  |

<sup>a</sup> Values outside and inside brackets are encoded and actual (unit for dosage and Ca<sup>2+</sup> concentration: mg/L) values, respectively.



**Table S4.** RSM experimental design and results for fluorescent intensity response in binary-solute solutions containing FM-AA-APEO and ferric ions.

|    | <b>Fe<sup>3+</sup> <sup>a</sup></b> | <b>Dosage <sup>a</sup></b> | <b>Experimental value</b> | <b>Predicted value</b> |
|----|-------------------------------------|----------------------------|---------------------------|------------------------|
| 1  | -2 (5)                              | 2 (34)                     | 3177.31                   | 3008.88                |
| 2  | 2 (25)                              | -2 (2)                     | 24.14                     | 198.8                  |
| 3  | 0 (15)                              | -1 (10)                    | 973.30                    | 996.64                 |
| 4  | 1 (20)                              | 1 (26)                     | 2335.90                   | 2532.24                |
| 5  | 0 (15)                              | 0 (18)                     | 1889.62                   | 1822.88                |
| 6  | 1 (20)                              | 0 (18)                     | 1851.40                   | 1878.4                 |
| 7  | 0 (615)                             | 2 (34)                     | 3016.79                   | 2998.48                |
| 8  | -2 (5)                              | 0 (18)                     | 1930.96                   | 1779.52                |
| 9  | -1 (10)                             | 1 (26)                     | 2603.21                   | 2470.64                |
| 10 | 0 (15)                              | 1 (26)                     | 2424.37                   | 2490.16                |
| 11 | 2 (25)                              | 0 (18)                     | 1801.89                   | 1956.48                |
| 12 | -1 (10)                             | 0 (18)                     | 1920.68                   | 1789.92                |
| 13 | -2 (5)                              | -2 (2)                     | 81.07                     | -85.68                 |
| 14 | 1 (20)                              | -1 (10)                    | 912.30                    | 1065.6                 |
| 15 | 2 (25)                              | 2 (34)                     | 2928.48                   | 3078.32                |
| 16 | -1 (10)                             | -1 (10)                    | 1033.25                   | 950.24                 |
| 17 | 0 (15)                              | -2 (2)                     | 38.28                     | 11.44                  |

<sup>a</sup> Values outside and inside brackets are encoded and actual (unit for Fe<sup>2+</sup> concentration and dosage: mg/L) values, respectively.

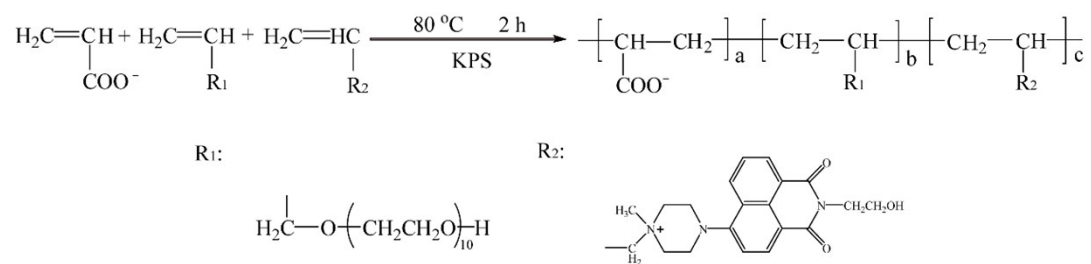

**Fig. S1.** Synthetic route of scale inhibitor FM-AA-APEO.

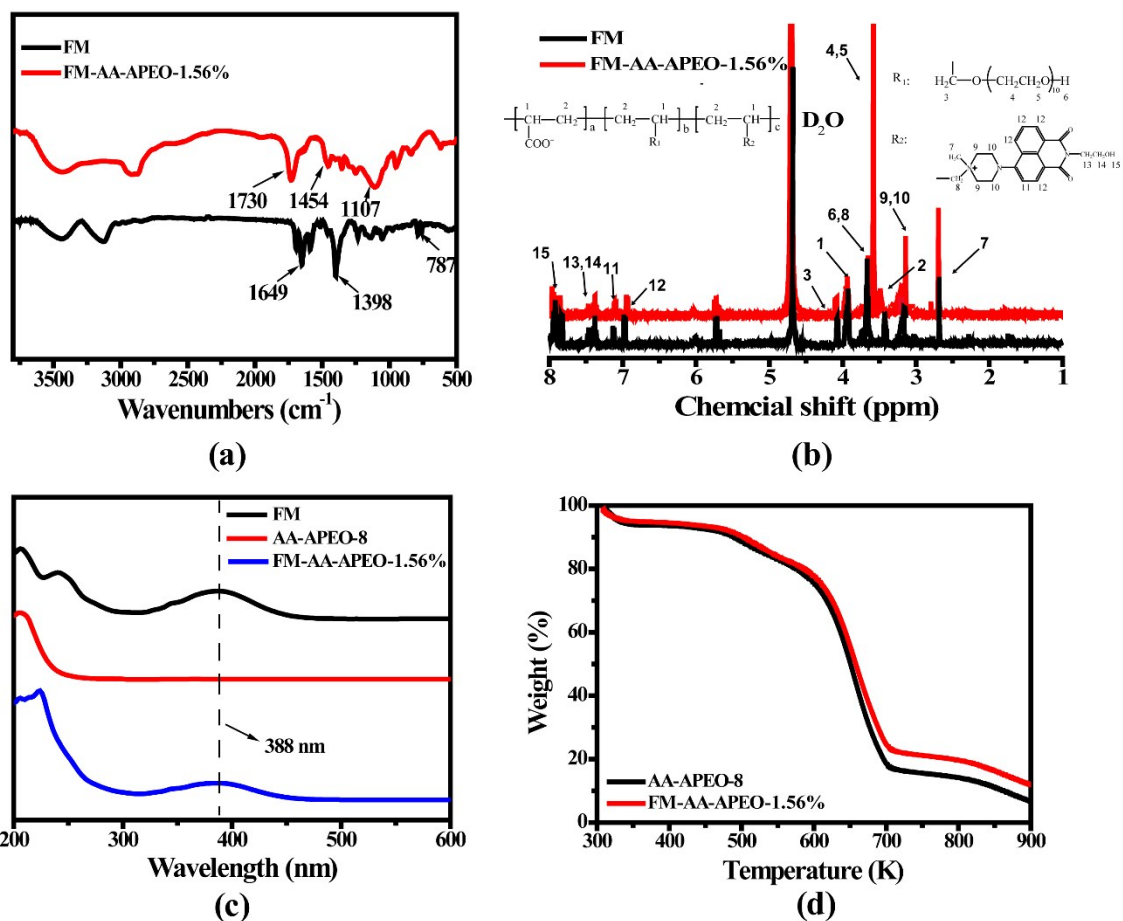

**Fig. S2.** (a) FTIR, (b)  $^1\text{H}$  NMR, (c) UV-vis spectra and (d) TG curves of different samples.

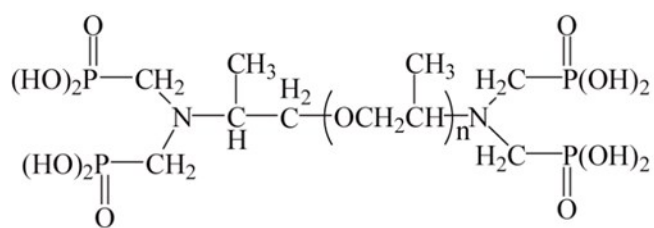

PAPEMP

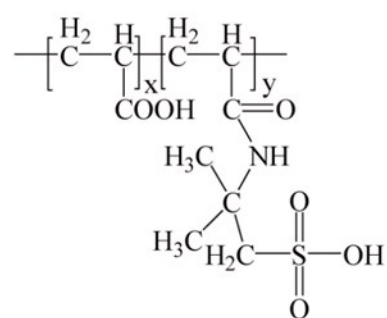

JH-907: AA/AMPS

**Fig. S3.** Chemical structure of two commercial scale inhibitors (PAPEMP and JH-907).

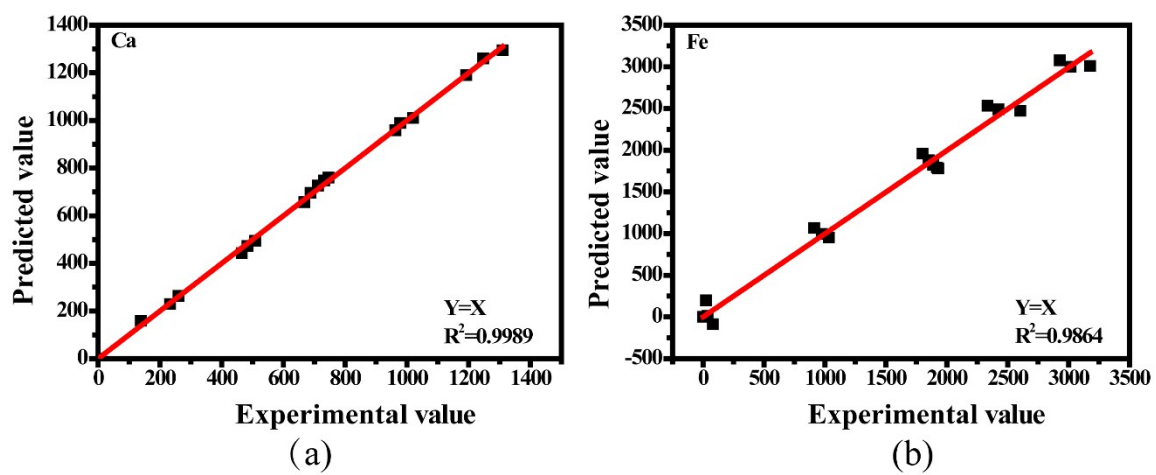

**Fig. S4.** Comparison between experimental and predicted values from RSM regression equations.

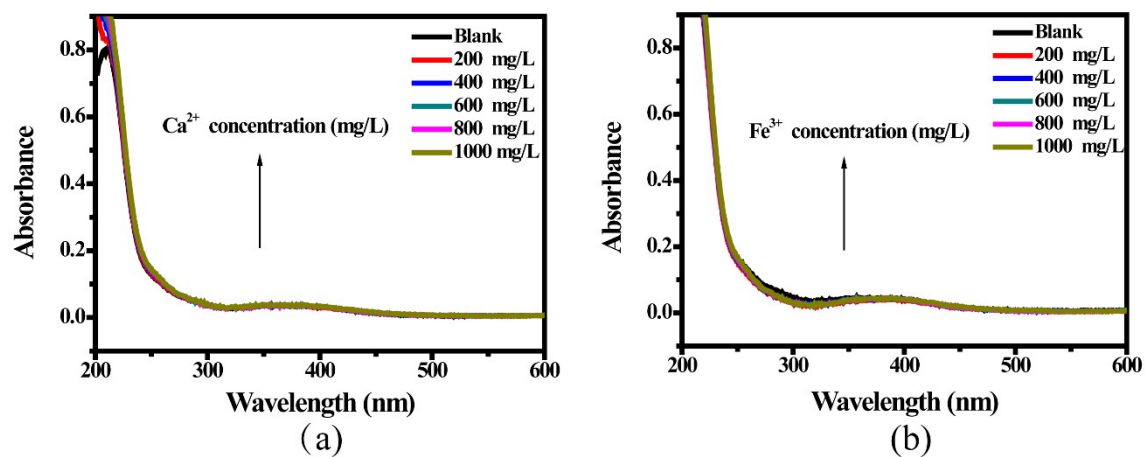

**Fig. S5.** UV spectra of AA-APEO-1.56% solution with the coexistence of different concentrations of (a)  $\text{Ca}^{2+}$  and (b)  $\text{Fe}^{3+}$ .

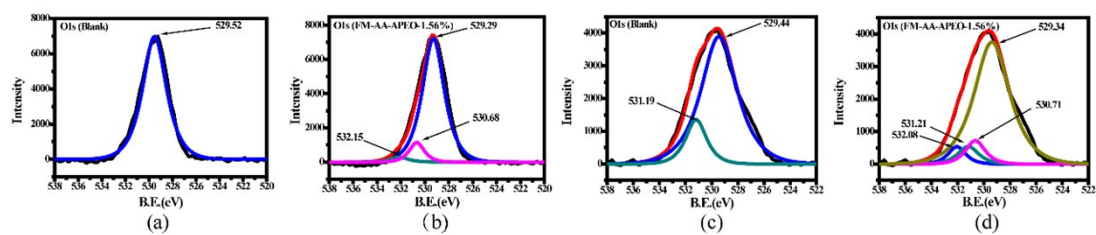

**Fig. S6.** O1s XPS spectra of (a and b)  $\text{Ca}_3(\text{PO}_4)_2$  and (c and d)  $\text{Fe}_2\text{O}_3$  precipitates (a and c) without and (b and d) with the coexistence of FM-AA-APEO.
